# Supplementary material
Source: publisher figshare collection journal article supplement (https://frontiersin.figshare.com/ndownloader/files/13570346)
Supplement: Supplementary file 1 [file 13570346]

**Supplementary Table 3.** List of the 16 species of trees from the humid forest in Corridor Ankeniheny Zahamena (East of Madagascar) and *Uapaca bojeri* trees from Isalo National Park, measured for bark thickness.

| **Vegetation type** | **Family** | **Species** | **Number of specimens** | **Relative bark thickness mean (%)** | **Standard error** |
| --- | --- | --- | --- | --- | --- |
| Humid forest | Lauraceae | *Cryptocarya acuminata* Schinz | 4 | 2.16 | 0.16 |
|  | Lauraceae | *Cryptocarya thouvenotii* (Danguy) Kosterm. | 1 | 1.5 | - |
|  | Lauraceae | *Cryptocarya ovalifolia* (Danguy) van der Werff | 2 | 1.92 | 0.04 |
|  | Clusiaceae | *Garcinia asterandra* Jum. & H. Perrier | 1 | 1.14 | - |
|  | Clusiaceae | *Garcinia dalleizettei* (H. Perrier) P. Sweeney & Z.S. Rogers | 1 | 2.07 | - |
|  | Euphorbiaceae | *Hancea capuronii* (Leandri) S.E.C. Sierra, Kulju & Welzen | 1 | 1.38 | - |
|  | Clusiaceae | *Symphonia eugenioides* Baker | 1 | 4.77 | - |
|  | Clusiaceae | *Symphonia urophylla* (Decne. ex Planch. & Triana) Benth. & Hook. f. ex Vesque | 1 | 3.97 | - |
|  | Clusiaceae | *Symphonia macrocarpa* Jum. & H. Perrier | 1 | 2.3 | - |
|  | Myrtacee | *Syzygium emirnense* (Baker) Labat & G.E. Schatz | 3 | 3.42 | 0.19 |
|  | Myrtacee | *Syzygium bernieri* (Drake) Labat & G.E. Schatz | 3 | 3.05 | 0.68 |
|  | Myrtacee | *Syzygium loiseleurioides* (Baker) Govaerts | 1 | 3.4 | - |
|  | Myrtacee | *Syzygium phillyraeoides* (Trimen) Santapau | 1 | 3.77 | - |
|  | Salicaceae | *Tisonia ficulnea* Baill. | 1 | 3.21 | - |
|  | Phyllanthaceae | *Uapaca densifolia* Baker | 3 | 2.62 | 0.33 |
|  | Phyllanthaceae | *Uapaca ferruginea* Leandri | 2 | 6.15 | 2.95 |
| Tapia woodland | Phyllanthaceae | *Uapaca bojeri* Baill. | 39 | 13.5 | 0.63 |
